# Supplementary material
Source: PubMed Central journal article supplement (PMC2859997)

**Mishra et al Supplemental Figures :**

**Supplemental Figure 1:** Mitochondria in primary culture of mouse kidney proximal tubule cells stained with MitoTracker Red dye. Mitochondria appear short and stubby in these primary kidney epithelial cells.

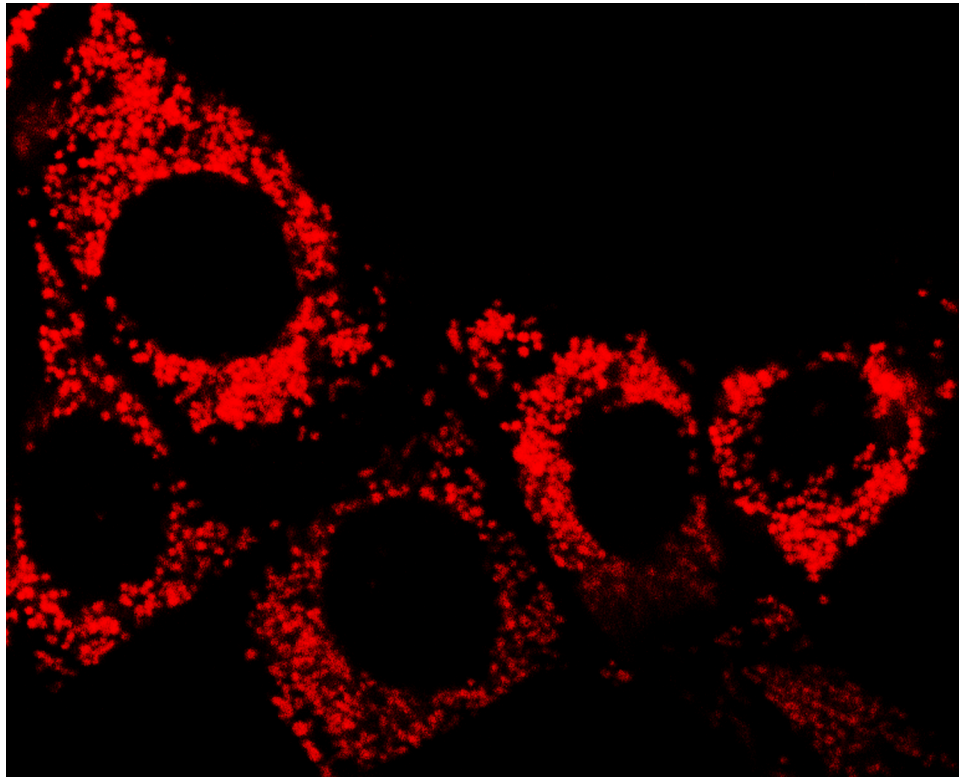

**Supplemental Figure 2: Effect of ROS scavengers on 15d-PGJ2 induced mitochondrial remodeling.** Mitochondrial morphology observed after 2h of treatment with 15d-PGJ2 in the absence or presence of reactive oxygen species (ROS) scavengers NAC (10 mM), NMPG (5 mM), TEMPOL (1 mM) and Trolox (500  $\mu$ M). Cells were preincubated with inhibitors for 1h prior to the addition of 15d-PGJ2. Bar: 10  $\mu$ m.

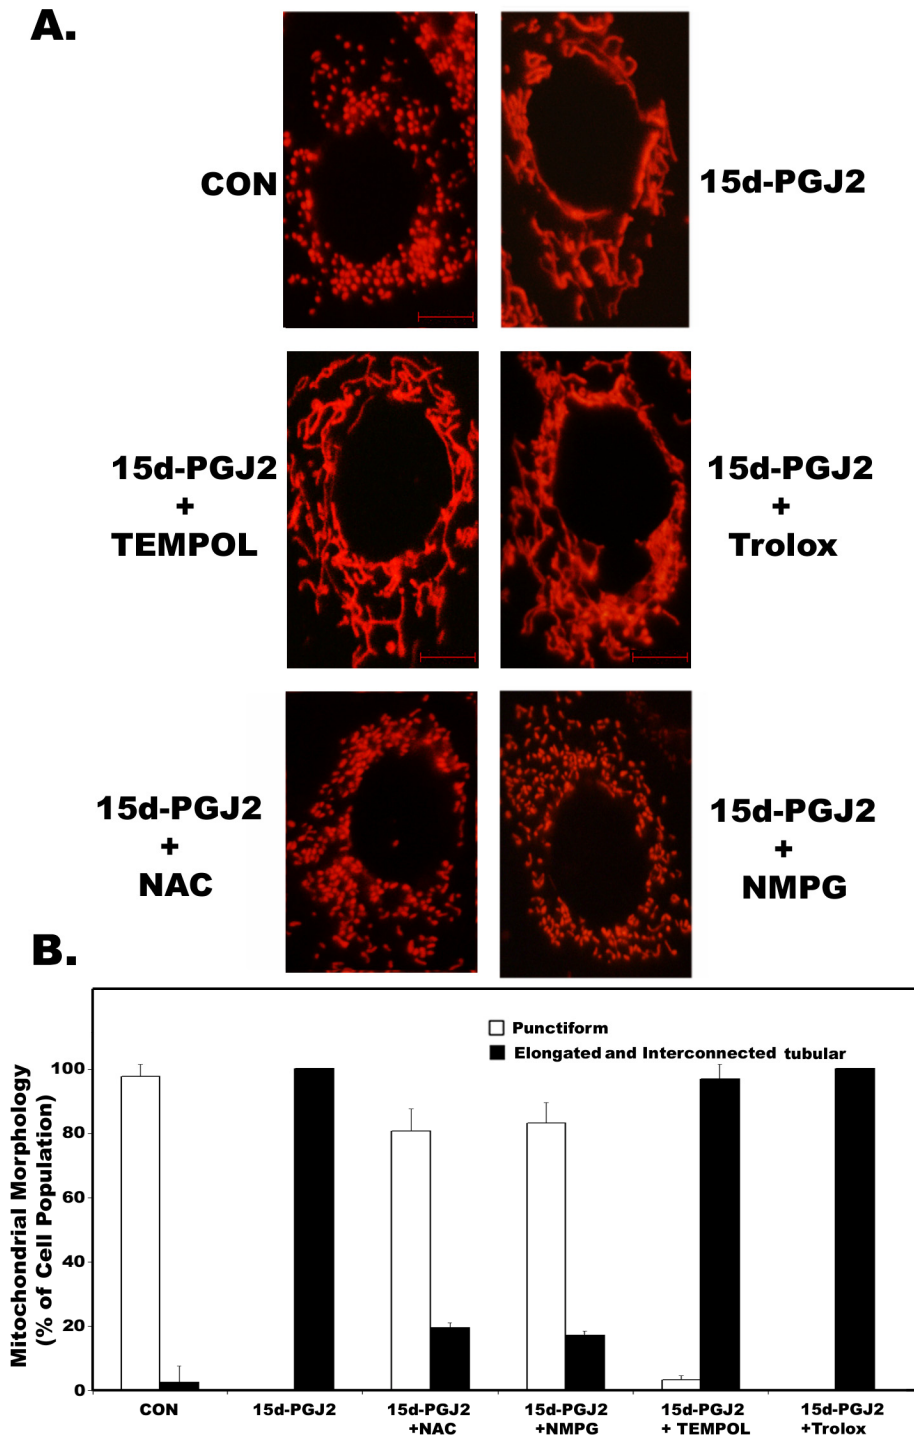

Supplement: NIHMS191143-supplement-01.pdf [file NIHMS191143-supplement-01.pdf]
